# Supplementary material for: SERT and uncertainty: serotonin transporter expression influences information processing biases for ambiguous aversive cues in mice
Source: PubMed Central journal article supplement (PMC4440341; doi:10.1111/gbb.12215), 2015-04-17
Supplement: gbb0014-0330-sd1.pdf [file gbb0014-0330-sd1.pdf]

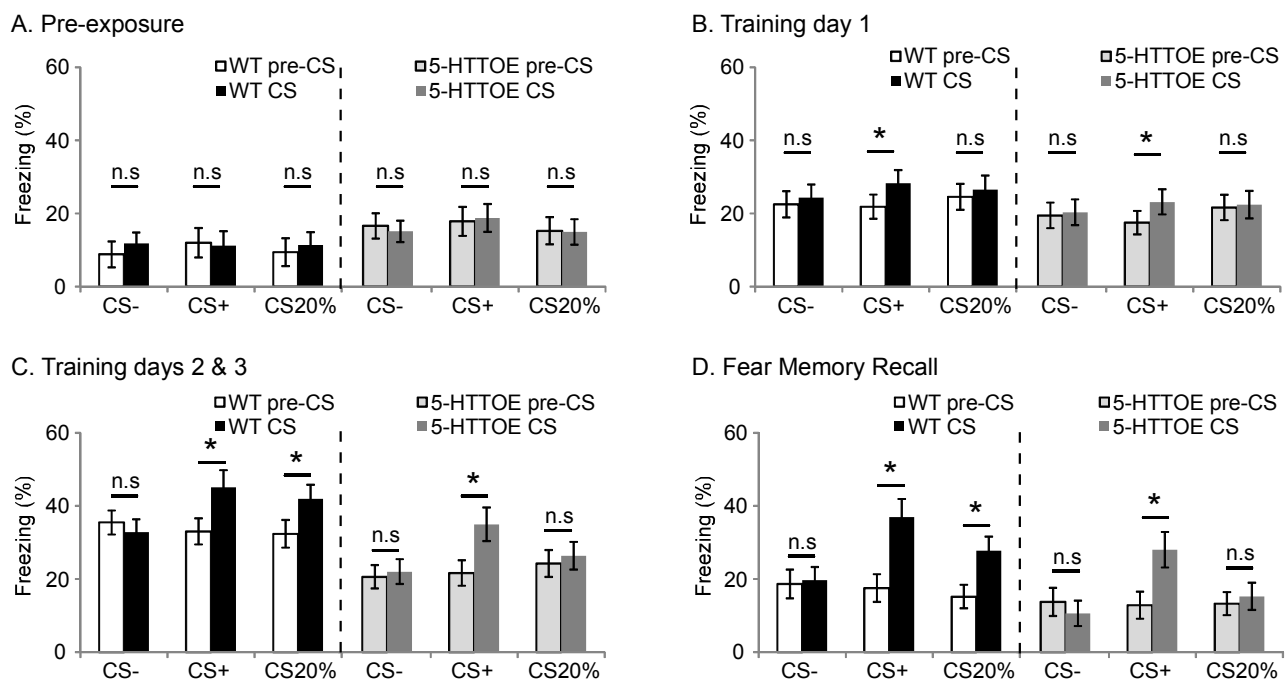

Supplementary Figure S1. Raw freezing responses in WT and 5-HTTOE mice showing pre-CS freezing (white bars for WT, light gray for 5-HTTOE) and during-CS freezing (black bars for WT, dark gray for 5-HTTOE) for the three cue types (CS-, CS+, CS20%). A. Responses during pre-exposure. B. Responses during training day 1. C. Responses averaged over training days 2 and 3. D. Responses during the first two trials of the fear memory recall session. \* $p < 0.05$ ; n.s: non-significant.
