# Supplementary material for: SERT and uncertainty: serotonin transporter expression influences information processing biases for ambiguous aversive cues in mice
Source: PubMed Central journal article supplement (PMC4440341; doi:10.1111/gbb.12215), 2015-04-17
Supplement: gbb0014-0330-sd3.pdf [file gbb0014-0330-sd3.pdf]

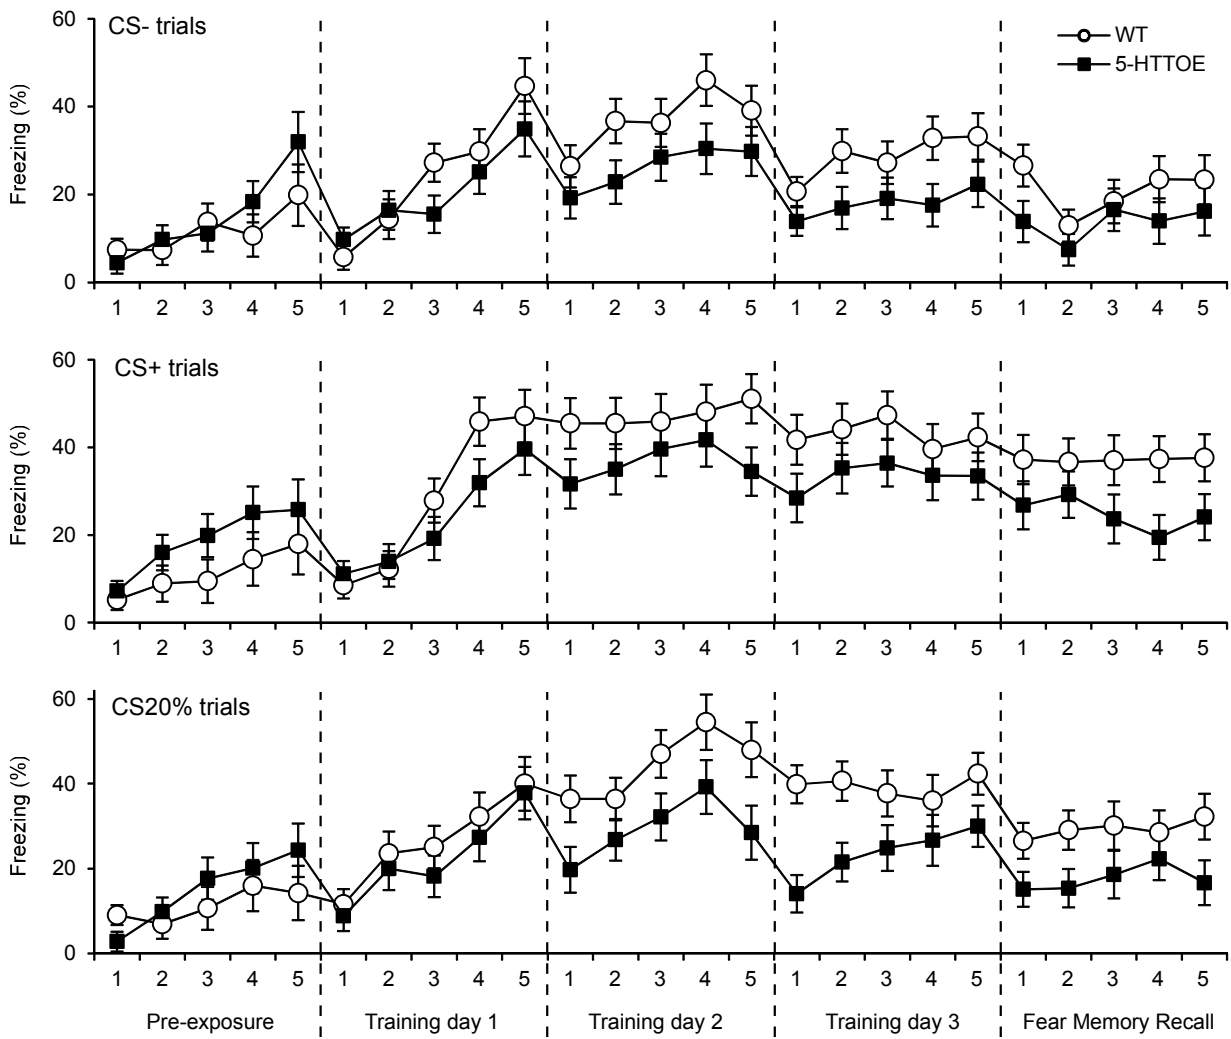

Supplementary Figure S3. Raw cue-evoked freezing responses in WT and 5-HTTOE mice across all trials of the experiment for CS- (upper panel), CS+ (middle panel), and CS20% (lower panel).
