# Supplementary material for: SERT and uncertainty: serotonin transporter expression influences information processing biases for ambiguous aversive cues in mice
Source: PubMed Central journal article supplement (PMC4440341; doi:10.1111/gbb.12215), 2015-04-17
Supplement: gbb0014-0330-sd4.pdf [file gbb0014-0330-sd4.pdf]

# Supplementary Material

## **SERT and uncertainty: serotonin transporter expression influences information processing biases for ambiguous aversive cues in mice**

Stephen B. McHugh, Christopher Barkus, Joao Lima, Lucas R. Glover, Trevor Sharp, David M. Bannerman

### **Contents:**

|                                |   |
|--------------------------------|---|
| <i>Supplementary Figure S1</i> | 2 |
| <i>Supplementary Results</i>   | 3 |
| <i>Supplementary Figure S2</i> | 5 |
| <i>Supplementary Figure S3</i> | 6 |

A. Pre-exposure

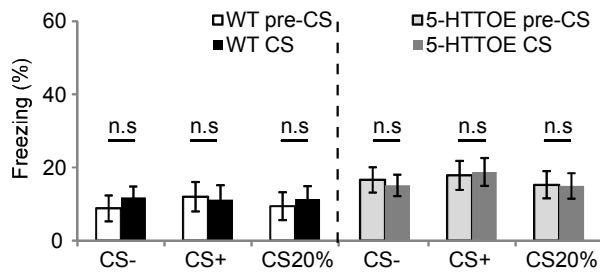

B. Training day 1

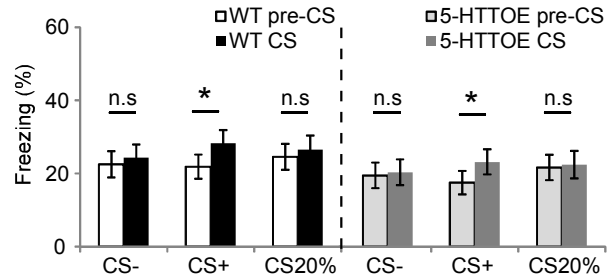

C. Training days 2 & 3

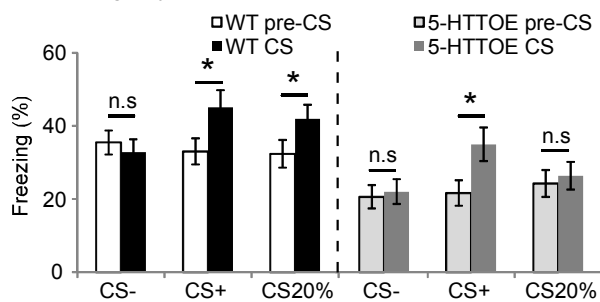

D. Fear Memory Recall

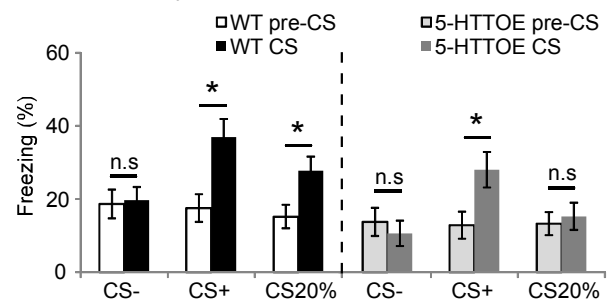

Supplementary Figure S1. Raw freezing responses in WT and 5-HTTOE mice showing pre-CS freezing (white bars for WT, light gray for 5-HTTOE) and during-CS freezing (black bars for WT, dark gray for 5-HTTOE) for the three cue types (CS-, CS+, CS20%). A. Responses during pre-exposure. B. Responses during training day 1. C. Responses averaged over training days 2 and 3. D. Responses during the first two trials of the fear memory recall session. \* $p < 0.05$ ; n.s: non-significant.

### *Supplementary Results*

Figure S1 shows raw pre-cue (pre-CS) and cue-evoked (CS) freezing responses for all days of the experiment. We first analysed these freezing responses for the pre-exposure day (ANOVA model: genotype<sub>2</sub> × phase<sub>(pre-CS,during CS)</sub><sub>2</sub> × CS type<sub>3</sub> × trial<sub>5</sub> × S<sub>51</sub>). There was a main effect of trial ( $F(4,196) = 10.6, P < 0.001$ ), reflecting the increase in immobility over the course of the session, but there were no other main effects or interactions (see Figure S1A).

Performing the same analysis on training day 1 revealed main effects of phase ( $F(1,49) = 10.6, P = 0.002$ ) and trial ( $F(4,196) = 48.2, P < 0.001$ ), and an interaction between phase and CS type ( $F(2,98) = 3.8, P = 0.025$ ). Simple main effects analysis of the effect of phase within each CS type revealed higher freezing during CS+ trials compared to the pre-CS+ period ( $F(1,49) = 12.1; P = 0.001$ ), and this effect was equivalent in both genotypes, whereas there was no effect of phase for the CS- or CS20% trials ( $F(1,49) < 1.2; P > 0.25$ ). There were no other main effects or interactions. These data are summarized in Figure S1B.

An analysis spanning training days 2 and 3 (ANOVA model: genotype<sub>2</sub> × phase<sub>(preCS,during CS)</sub><sub>2</sub> × day<sub>2</sub> × CS type<sub>3</sub> × trial<sub>5</sub> × S<sub>51</sub>) revealed a three-way interaction between genotype, phase, and CS type ( $F(2,98) = 3.1, P = 0.048$ ). Simple main effects analysis in the 5-HTTOE mice revealed a main effect of phase in CS+ trials ( $F(1,49) = 16.9, P < 0.001$ ) but not in CS- or CS20% trials ( $F(1,49) < 1.8, P = 0.2$ ). In contrast, in WT mice there was a main effect of phase in both the CS+ ( $F(1,49) = 13.4, P = 0.001$ ) and CS20% trials ( $F(1,49) = 35.5, P < 0.001$ ) but not in the CS- trials ( $F(1,49) = 1.4, P = 0.2$ ). These data are summarized in Figure S1C.

Finally, we analysed pre-CS and CS freezing levels for the first two trials of each type during the fear memory recall day (ANOVA model: genotype<sub>2</sub> × phase<sub>(preCS,during CS)</sub><sub>2</sub> × CS type<sub>3</sub> ×

trial<sub>2</sub> × S<sub>51</sub>). This analysis revealed main effects of phase ( $F(1,49) = 44.2, P < 0.001$ ) and CS type ( $F(2,98) = 6.1, P = 0.003$ ), as well as interactions between CS type and phase ( $F(2,98) = 11.6, P < 0.001$ ) and genotype and phase ( $F(1,49) = 7.2, P = 0.01$ ). Although the three-way interaction between genotype, CS type, and phase was not significant ( $F(2,98) = 0.5, P = 0.6$ ), simple main effects analysis were informative about how 5-HTTOE and WT mice changed their freezing responses in the presence of the cues. 5-HTTOE mice increased their freezing to the CS+ cue (effect of phase for CS+:  $F(1,49) = 11.0, P = 0.002$ ) but not the CS20% cue (effect of phase for CS20%:  $F(1,49) = 0.6, P = 0.5$ ). In contrast, WT mice increased their freezing to both the CS+ cue (effect of phase for CS+:  $F(1,49) = 17.3, P < 0.001$ ) and the CS20% cue (effect of phase for CS20%:  $F(1,49) = 22.4, P < 0.001$ ). These data are summarized in Figure S1D.

Raw freezing responses from the pre-CS and during-CS periods for all trials are shown in Figure S2 and S3, respectively. Note that raw freezing responses were lower in 5-HTTOE mice versus WTs during both pre-CS and CS periods during training days 2 and 3. The key point is that the change in freezing from pre-CS to during-CS was equivalent in WT and 5-HTTOE mice for CS- and CS+ trials but was significantly greater in WT than 5-HTTOE mice for CS20% trials, as shown in Figure S1C.

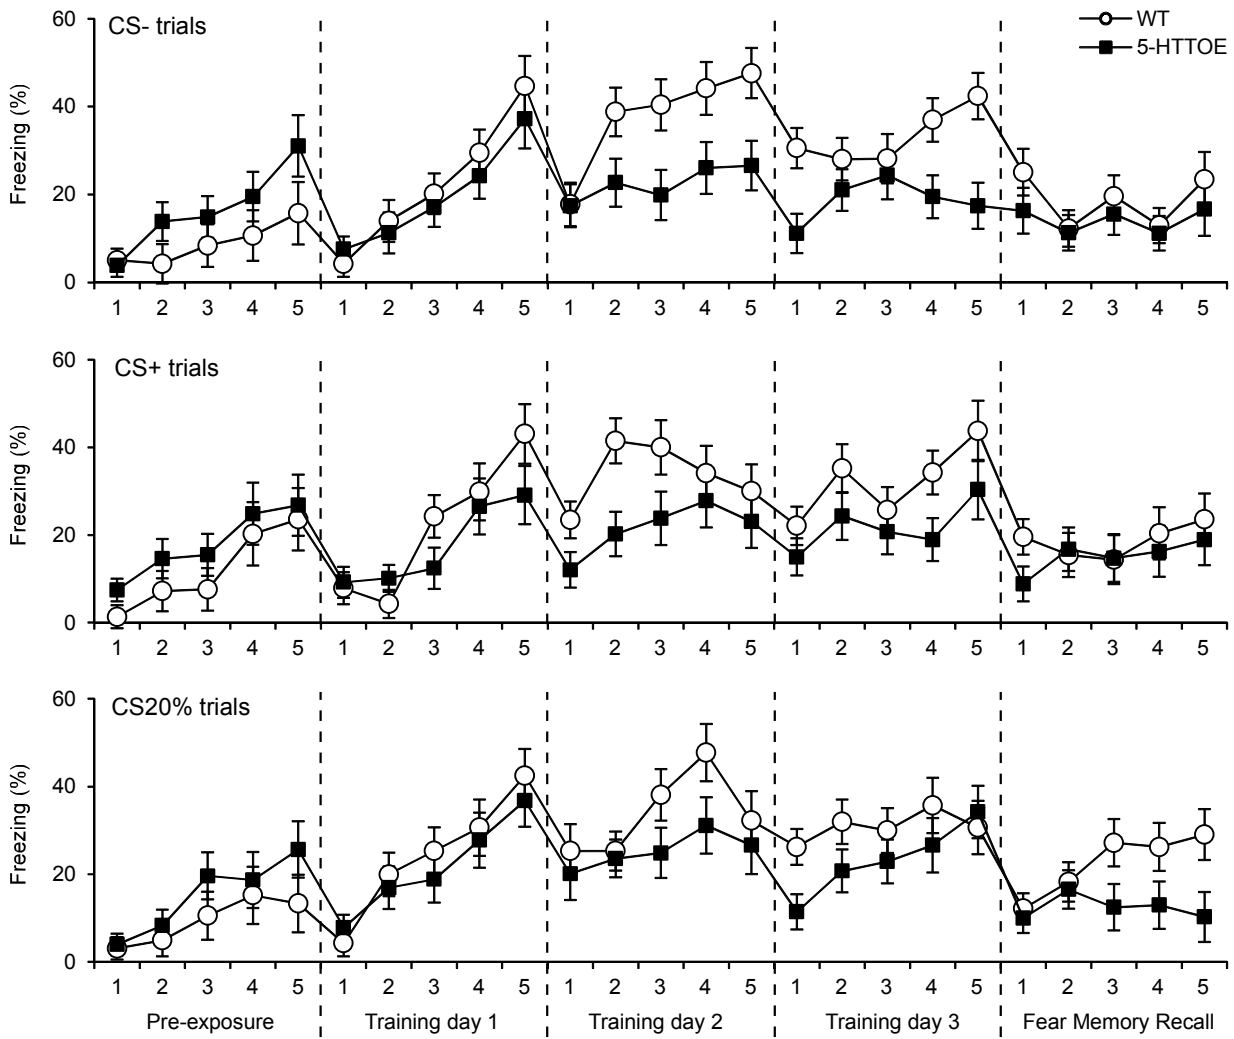

Supplementary Figure S2. Raw pre-CS freezing responses in WT and 5-HTTOE mice across all trials of the experiment for CS- (upper panel), CS+ (middle panel), and CS20% (lower panel).

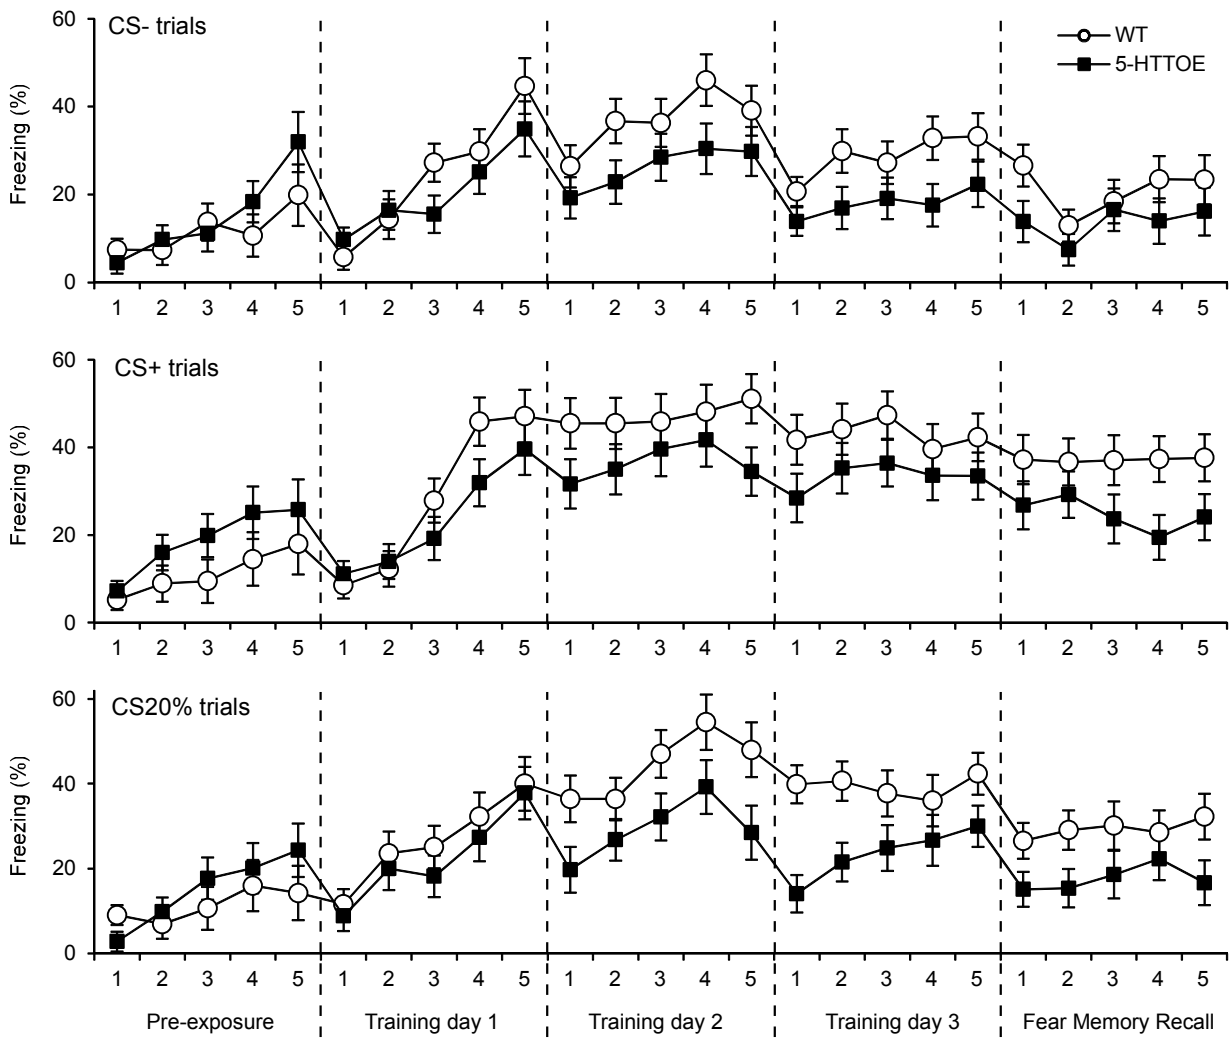

Supplementary Figure S3. Raw cue-evoked freezing responses in WT and 5-HTTOE mice across all trials of the experiment for CS- (upper panel), CS+ (middle panel), and CS20% (lower panel).
